# Supplementary material for: NIR-sensing ambipolar organic phototransistors with conjugated terpolymer layers based on diketopyrrolopyrrole-benzothiadiazole-naphthalenediimide comonomer units
Source: Royal Society of Chemistry journal article supplement (doi:10.1039/d2tc04889b), 2023-01-01
Supplement: d2tc04889b1.pdf [file d2tc04889b1.pdf]

## Supporting Information

### **NIR-Sensing Ambipolar Organic Phototransistors with Conjugated Terpolymer Layers Based on Diketopyrrolopyrrole-Benzothiadiazole-Naphthalenediimide Comonomer Units**

**Yeonhwa Cho<sup>1</sup>, Taehoon Kim<sup>1</sup>, Woongki Lee<sup>1</sup>, Hwajeong Kim<sup>1,2</sup>, Youngkyoo Kim<sup>1\*</sup>**

<sup>1</sup> Organic Nanoelectronics Laboratory and KNU Institute for Nanophotonics Applications (KINPA), Department of Chemical Engineering, Kyungpook National University, Daegu 41566, Republic of Korea

<sup>2</sup> Priority Research Center, Research Institute of Environmental Science & Technology, Kyungpook National University, Daegu 41566, Republic of Korea

\*Correspondence: Prof. Y. Kim

Email) [ykimm@knu.ac.kr](mailto:ykimm@knu.ac.kr)

Tel) +82-(0)53-950-5616

**Table S1.** Summary of ambipolar-type NIR-absorbing conjugated polymers reported to date.

| Authors          | Polymer Structure                                                                                                     | Device Performances                                                                                               | Refs. (Year)     |
|------------------|-----------------------------------------------------------------------------------------------------------------------|-------------------------------------------------------------------------------------------------------------------|------------------|
| M. Li, et al.    | 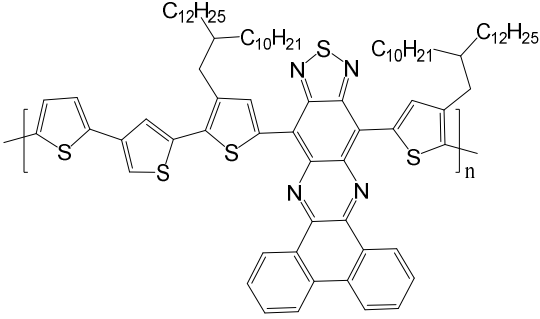 <p>PPhTQ (Copolymer)</p>            | <p>[Wavelength]<br/>500, 1200 nm</p> <p>[Voltage Window]<br/>±80V</p> <p>[OPTR Application]<br/>YES</p>           | SR-1 (2015)      |
| P. Wang, et al.  |  <p>PNDI-DPP (Copolymer)</p>         | <p>[Wavelength]<br/>900 nm</p> <p>[Voltage Window]<br/>±80V</p> <p>[OPTR Application]<br/>NO</p>                  | SR-2 (2015)      |
| G. Zhang, et al. |  <p>P3 (Copolymer)</p>              | <p>[Wavelength]<br/>800 nm</p> <p>[Voltage Window]<br/>±80V</p> <p>[OPTR Application]<br/>YES</p>                 | SR-3 (2016)      |
| Y. Cho, et al.   |  <p>PDPP-8OBT-NDI (Terpolymer)</p> | <p>[Wavelength]<br/>810 nm, 1100 nm (edge)</p> <p>[Voltage Window]<br/>±10V</p> <p>[OPTR Application]<br/>YES</p> | This work (2022) |

## **References for Table S1**

- SR-1. M. Li, C. An, T. Marszalek, X. Guo, Y. Long, H. Yin, C. Gu, M. Baumgarten, W. Pisula, K. Mullen, *Phenanthrene condensed thiadiazoloquinoxaline donor–acceptor polymer for phototransistor applications*, *Electrochem. Commun.* 74 (2017) 33-37.
- SR-2. P. Wang, H. Li, C. Gu, H. Dong, Z. Xu, H. Fu, *Air-stable ambipolar organic field-effect transistors based on naphthalenediimide–diketopyrrolopyrrole copolymers*, *RSC Adv.* 5 (2015) 19520.
- SR-3. G. Zhang, J. Guo, J. Zhang, W. Li, X. Wang, H. Lu, L. Qiu, *Benzodithiophenedione and diketopyrrolopyrrole based conjugated copolymers for organic thin-film transistors by structure modulation*, *Dyes Pigm.* 126 (2016) 20-28.

**Table S2.** Summary of device parameters under illumination with NIR light ( $\lambda = 810$  nm) for the OPTRs with the PDPP-8OBT-NDI sensing channel layers. Note that data were taken from the transfer curves in Figure 4a ( $V_G = V_D = \pm 10$  V), respectively.

| $P_{IN}$<br>( $\mu W/cm^2$ ) | $t$ (nm) | Channel | $\Delta V_{TH}$ (V) | $S_p$ (%) | $R_C$ (mA $W^{-1}$ ) | DCR  |
|------------------------------|----------|---------|---------------------|-----------|----------------------|------|
| 56                           | 40       | p       | -3.24               | 78.04     | 0.33                 | 1.10 |
|                              |          | n       | 3.38                | 36.02     | 0.16                 |      |
|                              | 80       | p       | -2.25               | 169.60    | 1.14                 | 1.21 |
|                              |          | n       | 2.81                | 165.57    | 0.98                 |      |
| 169                          | 40       | p       | -2.87               | 114.19    | 0.16                 | 1.11 |
|                              |          | n       | 2.90                | 62.99     | 0.10                 |      |
|                              | 80       | p       | -2.03               | 249.01    | 0.48                 | 1.22 |
|                              |          | n       | 2.43                | 206.55    | 0.46                 |      |
| 394                          | 40       | p       | -2.33               | 195.85    | 0.11                 | 1.12 |
|                              |          | n       | 2.37                | 124.26    | 0.08                 |      |
|                              | 80       | p       | -1.98               | 335.29    | 0.29                 | 1.23 |
|                              |          | n       | 2.13                | 294.26    | 0.27                 |      |
| 563                          | 40       | p       | -2.17               | 245.38    | 0.10                 | 1.14 |
|                              |          | n       | 2.34                | 163.48    | 0.75                 |      |
|                              | 80       | p       | -1.25               | 413.72    | 0.25                 | 1.27 |
|                              |          | n       | 1.78                | 373.36    | 0.24                 |      |

**Table S3.** Summary of device parameters under illumination with NIR light ( $\lambda = 905$  nm) for the OPTRs with the PDPP-8OBT-NDI sensing channel layers. Note that data were taken from the transfer curves in Figure 4a ( $V_G = V_D = \pm 10$  V), respectively.

| $P_{IN}$<br>( $\mu W/cm^2$ ) | $t$ (nm) | Channel | $\Delta V_{TH}$ (V) | $S_p$ (%) | $R_C$ (mA $W^{-1}$ ) | DCR  |
|------------------------------|----------|---------|---------------------|-----------|----------------------|------|
| 40                           | 40       | p       | -3.26               | 261.78    | 1.37                 | 1.10 |
|                              |          | n       | 3.81                | 180.70    | 1.03                 |      |
|                              | 80       | p       | -2.54               | 203.92    | 1.63                 | 1.21 |
|                              |          | n       | 2.59                | 190.98    | 1.45                 |      |
| 136                          | 40       | p       | -2.84               | 303.17    | 0.52                 | 1.14 |
|                              |          | n       | 3.37                | 222.30    | 0.42                 |      |
|                              | 80       | p       | -2.51               | 360.78    | 0.92                 | 1.24 |
|                              |          | n       | 2.55                | 325.40    | 0.85                 |      |
| 319                          | 40       | p       | -2.31               | 419.41    | 0.31                 | 1.16 |
|                              |          | n       | 2.37                | 311.76    | 0.25                 |      |
|                              | 80       | p       | -2.49               | 495.09    | 0.58                 | 1.25 |
|                              |          | n       | 2.54                | 481.96    | 0.50                 |      |
| 456                          | 40       | p       | -2.28               | 522.48    | 0.27                 | 1.18 |
|                              |          | n       | 2.32                | 415.93    | 0.24                 |      |
|                              | 80       | p       | -2.38               | 665.57    | 0.56                 | 1.27 |
|                              |          | n       | 2.47                | 622.54    | 0.44                 |      |

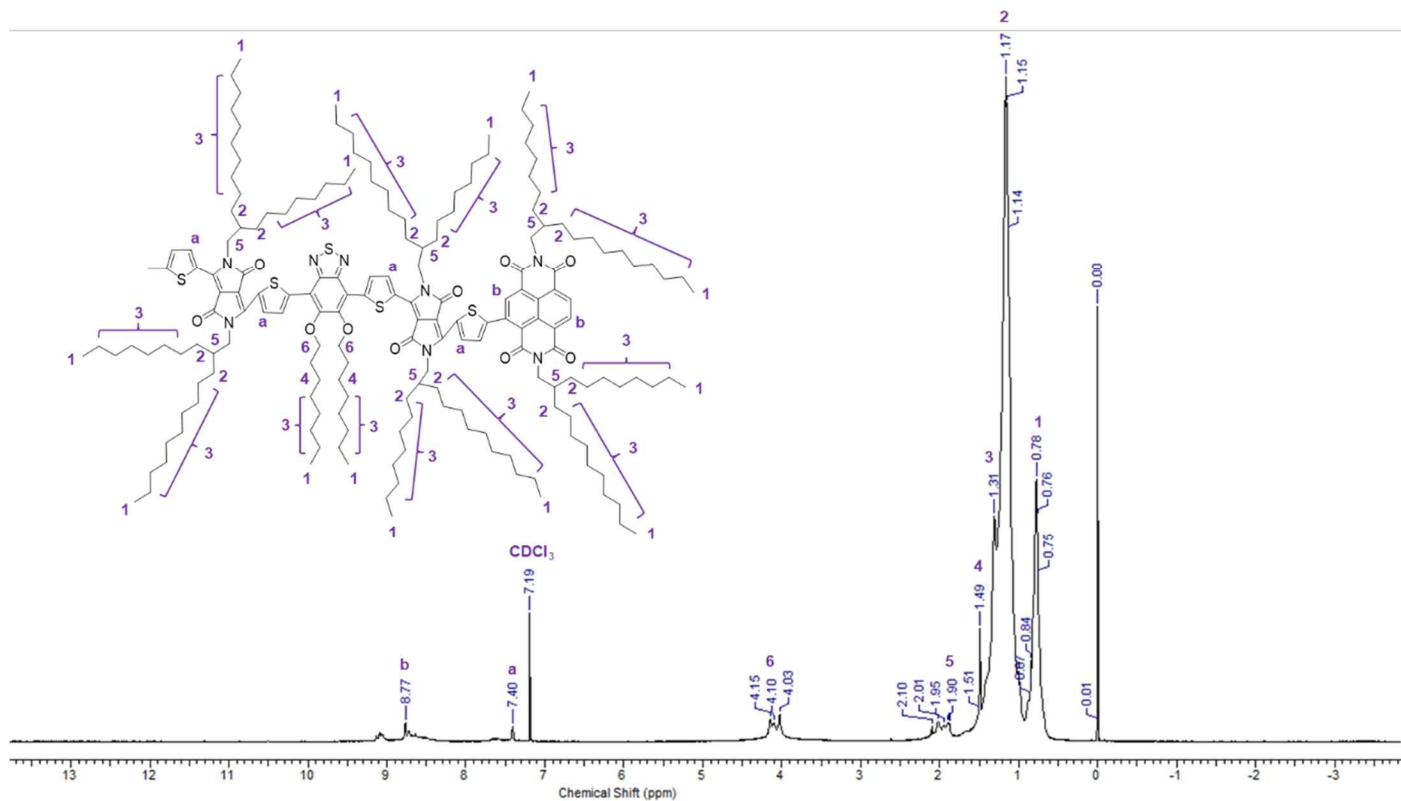

**Figure S1.**  $^1\text{H-NMR}$  (700 MHz) spectra for the PDPP-8OBT-NDI polymer (solvent:  $\text{CDCl}_3$ ) synthesized in this work. A detailed interpretation of the major peaks is given in the experimental section.

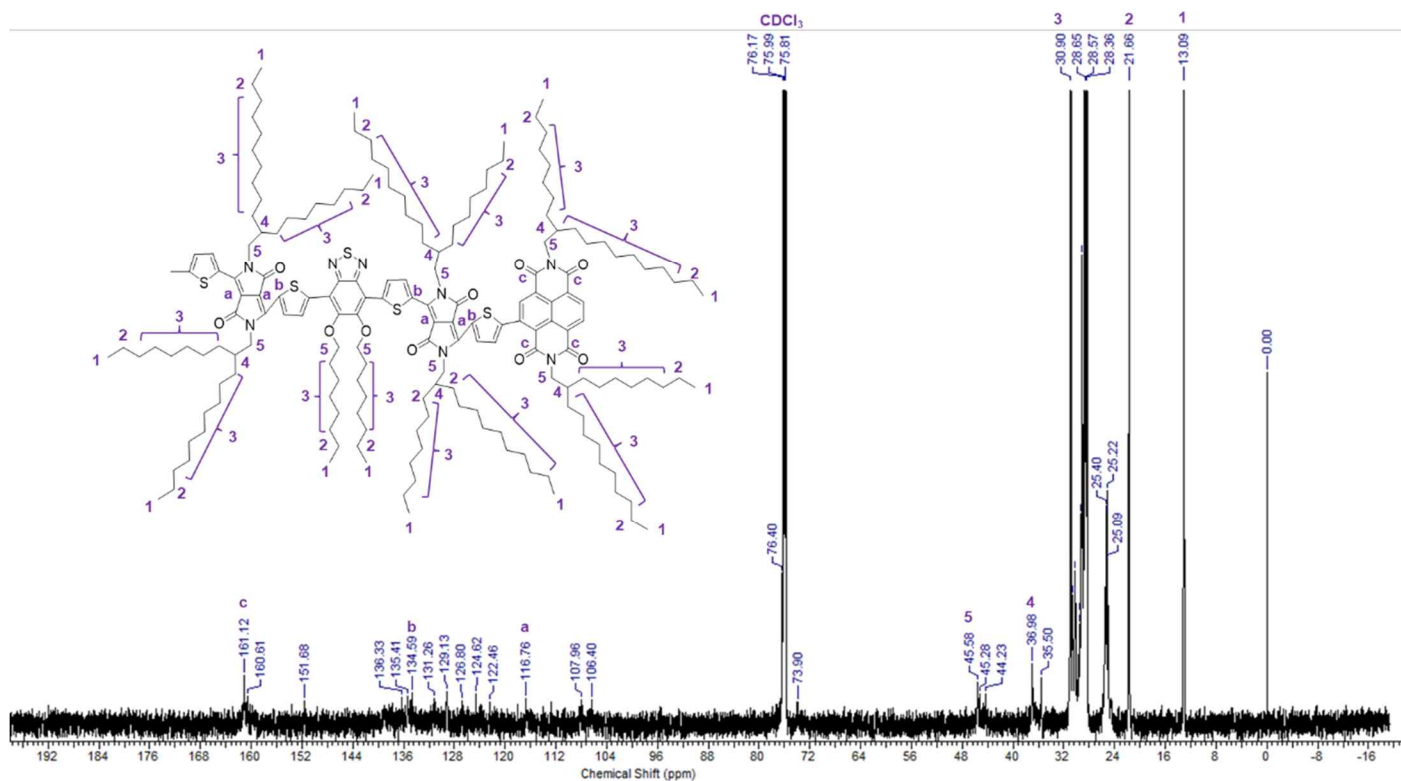

**Figure S2.**  $^{13}\text{C-NMR}$  (700 MHz) spectra for the PDPP-8OBT-NDI polymer (solvent:  $\text{CDCl}_3$ ) synthesized in this work. A detailed interpretation of the major peaks is given in the experimental section.

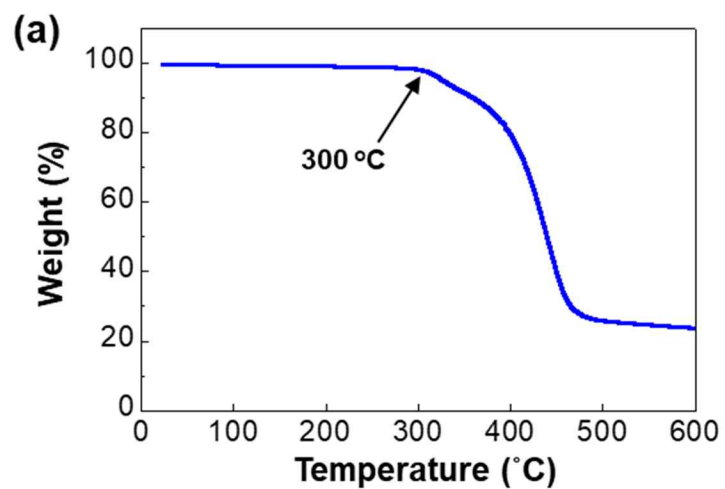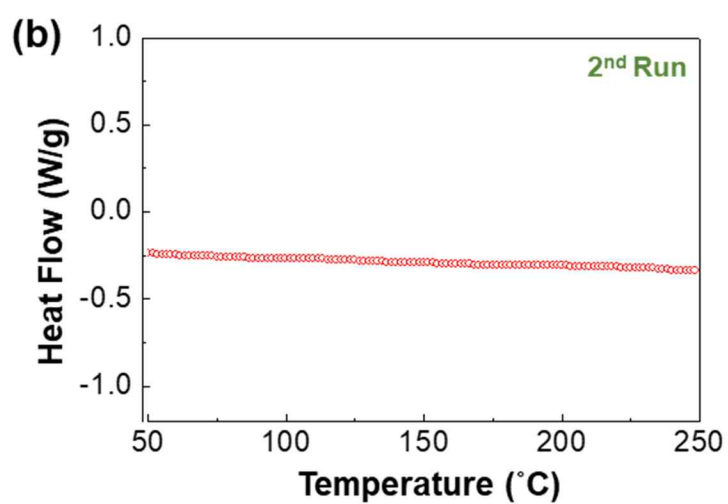

**Figure S3.** TGA (a) and DSC (b) thermograms (nitrogen environment) for the PDPP-8OBT-NDI polymer. The TGA measurement was carried out by heating at a ramp rate of 10 °C/min, while the DSC measurement was performed by scanning at a heating rate of 5 °C/min (second run).

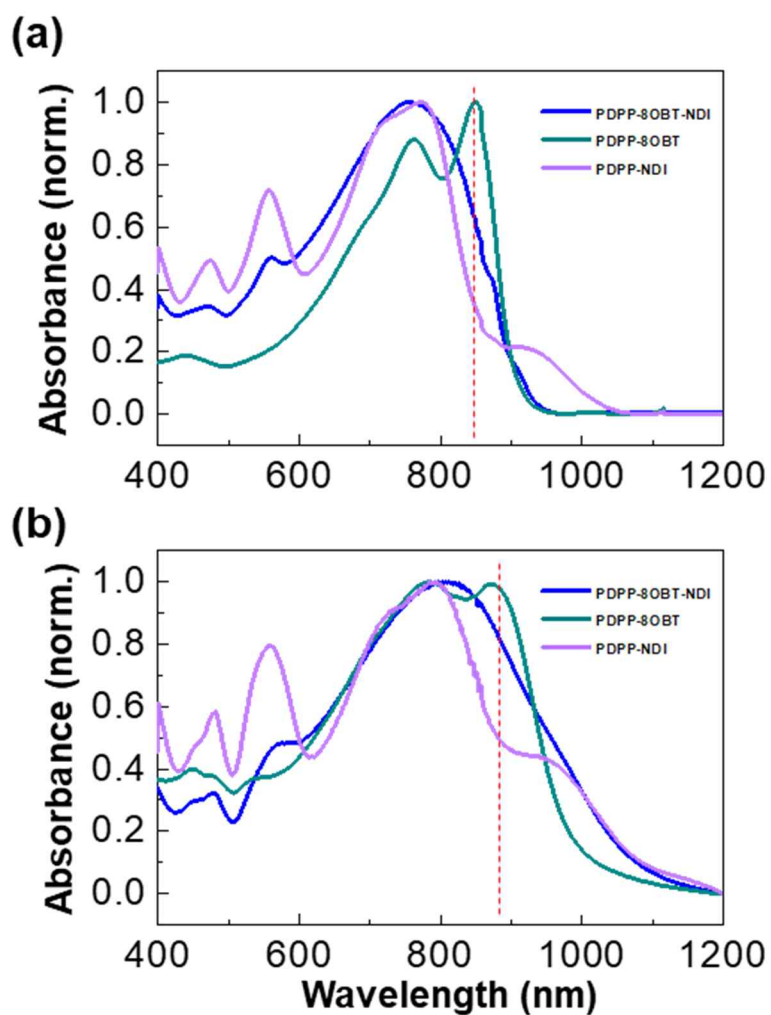

**Figure S4.** Optical absorption spectra of PDPP-8OBT, PDPP-NDI, and PDPP-8OBT-NDI polymers: (a) solutions (solvent: toluene), (b) films. On the basis of optical absorption spectra, the composition ratio of 8OBT to NDI comonomer in the PDPP-8OBT-NDI chains was calculated to 8OBT:NDI = 0.54:0.46 (from solutions) and 0.62:0.38 (from films).



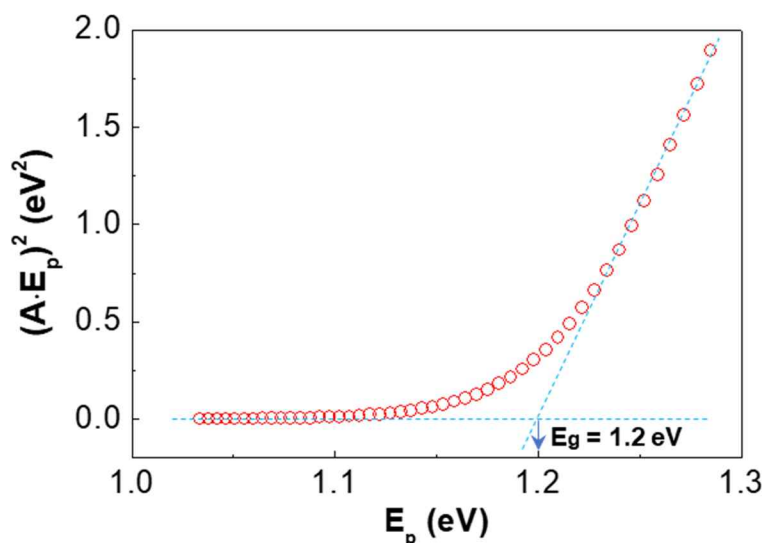

**Figure S5.** Tauc plot of the PDPP-8OBT-NDI film (original data: from the optical absorption spectrum in Figure 1b).  $A$  and  $E_p$  denote absorbance and photon energy, respectively.

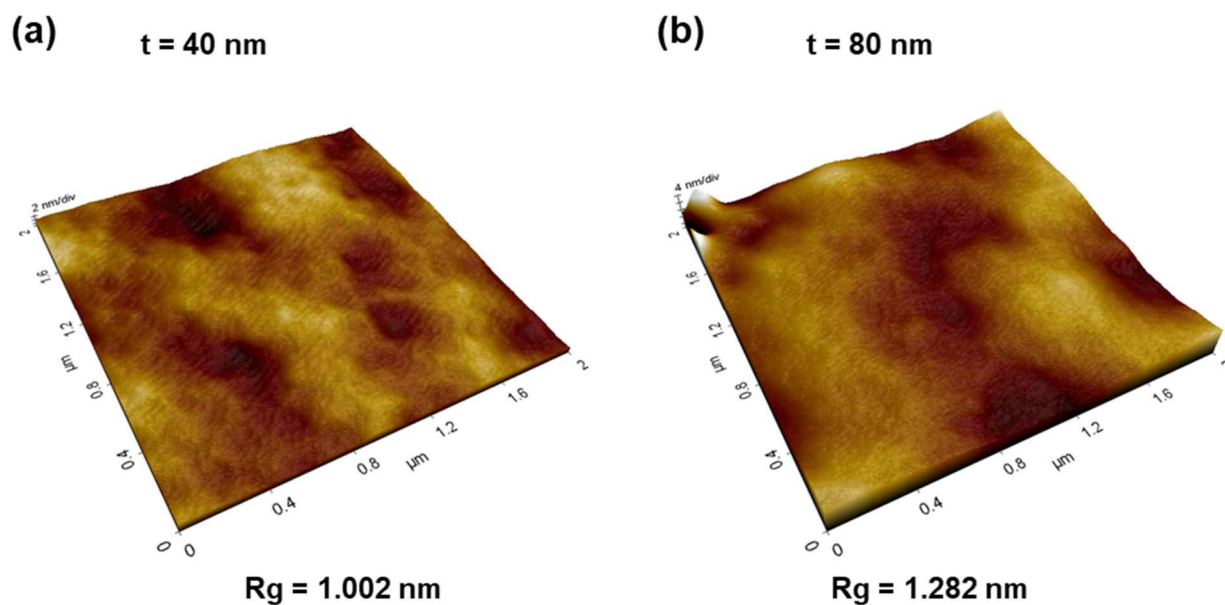

**Figure S6.** AFM (height-mode,  $2\ \mu\text{m} \times 2\ \mu\text{m}$ ) images of the PDPP-8OBT-NDI films: (a)  $t = 40\ \text{nm}$ , (b)  $t = 80\ \text{nm}$ . Note that the root-mean-square (rms) roughness ( $R_g$ ) from the AFM images was measured in the range of ca.  $1.0 \sim 1.3\ \text{nm}$ , which corresponds to ca.  $1.6 \sim 2.5\%$  compared to the thickness of films.
